# Supplementary material for: The joy of lottery play: evidence from a field experiment
Source: Springer Nature journal article supplement (doi:10.1007/s10683-020-09649-9), 2020-02-27
Supplement: 10683_2020_9649_MOESM1_ESM.pdf [file 10683_2020_9649_MOESM1_ESM.pdf]

# The Joy of Lottery Play: Evidence from a Field Experiment – Appendices B & C – not for publication

## Appendix B: Questionnaires

### B1: Questionnaire at $T_1$

**v1** Below, you can find ten different situations, where you are asked to choose between either one state lottery ticket (with a retail value of €15 and a Jackpot of 7,5 million euros) or a set sum of money. Please indicate whether you would prefer the lottery ticket or the money.

- v1a** Lottery ticket or €2.50
- v1b** Lottery ticket or €5.00
- v1c** Lottery ticket or €7.50
- v1d** Lottery ticket or €10.00
- v1e** Lottery ticket or €12.50
- v1f** Lottery ticket or €15.00
- v1g** Lottery ticket or €17.50
- v1h** Lottery ticket or €20.00
- v1i** Lottery ticket or €22.50
- v1j** Lottery ticket or €25.00

**v2** How happy do you feel today? Scale 1 (very unhappy) to 10 (very happy)

**v3** All things considered, how satisfied are you with your life as a whole? Scale 1 (very unsatisfied) to 10 (very satisfied)

**v4a - v4g** In which lotteries have you participated in the past year (April 2014 - April 2015)? Multiple answers possible.

- v4a** The Lotto
- v4b** The Postcode lottery
- v4c** The State lottery
- v4d** The Friends lottery
- v4e** The BankGiro Lottery
- v4f** Other lottery or lotteries
- v4g** I did not participate in any lottery: 0 = No, 1 = Yes

*if  $v4g \neq 1$*

**v5** How regularly have you participated in a lottery in the past year (April 2014 - April 2015)? *If you participate in more than one lottery, sum up the total of all the lotteries you participated in.*

- 1 Weekly or multiple times a week
- 2 Monthly, but not weekly
- 3 Multiple times a year, but not monthly
- 4 Once a year or never

*if  $v4g \neq 1$*

**v6** On average, how much do you spend on lottery-participation at a time?

- 1 Less than €10
- 2 €10 - €24,99
- 3 €25 - €49,99
- 4 €50 - €99,99
- 5 €100 - €499,99
- 6 €500 or more

*if v4g ≠ 1*

**v7** In the past year (April 2015 - April 2015), have you earned back your costs for lottery-participation?

- 1 No, I made more than €100 loss
- 2 No, but I made less than €100 loss
- 3 I spent about as much as I won
- 4 Yes, but I made less than €100 profit
- 5 Yes, I made more than €100 profit

*if v4g ≠ 1*

**v8a - v8h** On a scale from 1 (not at all) to 7 (completely), to what extent do you experience lottery draws as:

- v8a** A chance to be rich
- v8b** A fun activity
- v8c** A hobby or pastime
- v8d** A means against boredom
- v8e** Entertaining
- v8f** A source of income
- v8g** Relaxing
- v8h** A social activity with family and friends

*if v4g ≠ 1*

**v9** To what extent do you agree with the following statements: ‘Even if I don’t win anything, I enjoy participating in a lottery’. Scale 1 (completely disagree) to 7 (completely agree)

*if v4g ≠ 1*

**v10** How often do you talk about lottery-participation with friends, family or acquaintances? Scale from 1 (never) to 7 (always)

**v11** How large do you estimate the chance that you will ever win a big prize in a lottery? Scale from 1 (very small) to 7 (very big)

**v12a - v12g** In which of the following gambling games have you participated in the last year (April 2014 - April 2015)? Multiple answers possible.

*Please note: this is excluding participation in lotteries*

- v12a** Gambling in a casino
- v12b** Gambling on sporting matches
- v12c** Online gambling
- v12d** Gambling on a slot machine
- v12e** Playing cards (such as poker) for money
- v12f** Another gambling game

**v12g** I did not participate in any gambling games except for lotteries in the past year (April 2014 - April 2015); 0 = No, 1 = Yes

**v13a - v13f** On a scale from 1 (completely disagree) to 7 (completely agree), to what extent do you agree with the following statements:

**v13a** In uncertain times, I usually expect the best.

**v13b** If something can go wrong for me, it will.

**v13c** I am always optimistic about my future.

**v13d** I hardly ever expect things to go my way.

**v13e** I rarely count on good things happening to me.

**v13f** Overall, I expect more good things to happen to me than bad.

**v14** On a scale from 1 (completely disagree) to 7 (completely agree), to what extent do you agree with the following statements: 'I am a person that is often lucky.'

**v15a - v15i** On a scale from 1 (completely disagree) to 7 (completely agree), to what extent do you agree with the following statements:

**v15a** I like to own things that impress other people.

**v15b** The things I own say a lot about how well I'm doing in life.

**v15c** I admire people who own expensive homes, cars, and clothes.

**v15d** I try to keep my life simple, as far as possessions are concerned.

**v15e** Buying things gives me a lot of pleasure.

**v15f** I like a lot of luxury in my life.

**v15g** My life would be better if I owned certain things I don't have.

**v15h** I wouldn't be any happier if I owned nicer things.

**v15i** It sometimes bothers me quite a bit that I can't afford to buy all the things I'd like.

**v16a - v16i** On a scale from 1 (completely disagree) to 7 (completely agree), to what extent do you agree with the following statements:

**v16a** My life is determined by my own actions.

**v16b** I am usually able to protect my personal interests.

**v16c** I can pretty much determine what will happen in my life.

**v16d** To a great extent, my life is controlled by accidental happenings.

**v16e** Often there is no chance of protecting my personal interests from bad luck happenings.

**v16f** When I get what I want, it's usually because I'm lucky.

**v16g** People like myself have very little chance of protecting our personal interests where they conflict with those of strong pressure groups.

**v16h** My life is chiefly controlled by powerful others.

**v16i** I feel like what happens in my life is mostly determined by powerful people.

## **B2: Questionnaire at $T_2$**

**v1** On a scale from 1 (extremely unhappy) to 10 (extremely happy), how happy do you feel today?

**v2** On a scale from 1 (very unsatisfied) to 10 (very satisfied), all things considered, how satisfied are you with your life-as-a-whole?

*if respondents received a ticket from the State Lottery*

**v3** Recently, you have received a ticket for the State Lottery for the drawing of 10 may. On a scale from 1 (not happy at all) to 7 (very happy), how happy are you with this ticket?

*if respondents did not receive a ticket from the State Lottery*

**v4** On May 10<sup>th</sup> there is a draw of the State Lottery. Do you have a tickets for this draw, or do you intend to purchase a ticket for this draw?

1 No

2 Yes, I have a tickets

3 Yes, I am going to buy a ticket

*if people received a ticket from the State lottery or if v4>1*

**v5a - v5h** On a scale from 1 (not at all) to 7 (completely), to what extent do you perceive the oncoming draw of the State Lottery as:

**v5a** A chance to be rich

**v5b** A fun activity

**v5c** A hobby or pastime

**v5d** A means against boredom

**v5e** Entertaining

**v5f** A source of income

**v5g** Relaxing

**v5h** A social activity with family and friends

*if people received a ticket from the State lottery or if v4>1*

**v6** On a scale from 1 (never) to 7 (always), how often do you think about the draw of the State Lottery?

*if people received a ticket from the State lottery or if v4>1*

**v7** On a scale from 1 (not at all) to 7 (completely), which emotions do you experience when you think about the upcoming draw of the State Lottery? When I think about my participation in the State Lottery. . .

**v7a** I'm happy

**v7b** I'm worried

**v7c** I'm hopeful

**v7d** I'm sad

**v7e** I'm annoyed

**v7f** I'm excited

**v7g** I'm curious

**v7h** I'm disappointed

**v7i** I feel trusting

**v7j** I feel regret

**v7k** I feel amused

**v7l** I feel friendly

**v7m** I feel distant

**v7n** I feel indifferent

**v8** On a scale from 1 (very small) to 7 (very large), how large do you estimate the chance that you will ever win a big price in a lottery?

**v9** On a scale from 1 (completely disagree) to 7 (completely agree), to what extent do you agree with the following statements: ‘I am a person that is often lucky’

### **B3: Questionnaire at $T_3$**

**v1** On a scale from 1 (very unhappy) to 10 (very happy), how happy do you feel today?

**v2** On a scale from 1 (very dissatisfied) to 10 (very satisfied), all things considered, how satisfied are you with your life-as-a-whole?

*if people received a ticket from the State lottery*

**v3** Recently, you have received a ticket for the State Lottery for the drawing of 10 may. On a scale from 1 (not happy at all) to 7 (very happy), how happy are you with this ticket?

*if people received a ticket from the State lottery*

**v4** Have you, apart from the lottery ticket you received, participated with another ticket in the draw of the State Lottery of May 10<sup>th</sup>?

- 1 No
- 2 No, but someone else in my household has
- 3 Yes

*if people indicated to buy or bought a ticket from the State lottery at  $T_2$*

**v5** Have you participated in a lottery in the past week?

1. No
2. Yes, I already bought a ticket
3. Yes, I will buy a ticket

**v6dag - v6uit** On May 10<sup>th</sup> 2015 there was a draw of the State Lottery. You had a ticket for this draw. When did you read the results?

*If you haven't done it yet, we ask you to check the results now (on ‘[www.staatsloterij.nl/trekkingsuitslag](http://www.staatsloterij.nl/trekkingsuitslag)’) before proceeding with the following questions.*

Fill out a day and a time. If you don't remember exactly, please give your best estimate. (For example: Monday 9:30)

**v6dag** Day

**v6tijd** Time

**v6link** I have just checked the results using the link; 0 = No, 1 = Yes

**v6uit** I don't want to know the results; 0 = No, 1 = Yes

*if people received a ticket from the State lottery or if  $v_5=2$*

**v7a - v7n** What emotions do you experience when you think back to you participation in the draw of the State Lottery of May 10<sup>th</sup>? On a scale from 1 (not at all) to 7 (completely), when I think about my participation in the State Lottery...

- v7a** I'm happy
- v7b** I'm worried
- v7c** I'm hopeful
- v7d** I'm sad
- v7e** I'm annoyed
- v7f** I'm excited

- v7g** I'm curious
- v7h** I'm disappointed
- v7i** I feel trusting
- v7j** I feel regret
- v7k** I feel amused
- v7l** I feel friendly
- v7m** I feel distant
- v7n** I feel indifferent

*if (staatslot=1 or v5=2) and if people do not want to know the results (v6)*

**v8** Did you win anything with your ticket for the State Lottery?

- 1 No
- 2 Yes, less than €10
- 3 Yes, €10 - €49,99
- 4 Yes, €50 - €99,99
- 5 Yes, €100 - €499,99
- 6 Yes, €500 or more

*if (staatslot=1 or v5=2) and if people do not want to know the results (v6)*

**v9a - v9e** Did you tell others whether you won anything in the State Lottery?

Multiple answers possible

- v9a** No
- v9b** Yes, friends
- v9c** Yes, partner or children
- v9d** Yes, other family members
- v9e** Yes, to others

*if staatslot=1 or v5=2*

**v10** On a scale from 1 (never) to 7 (all the time), how often did you think about the draw of the lottery before the actual draw?

**v11** On a scale from 1 (very small) to 7 (very large), how large do you estimate the chance that you will ever win a big price in a lottery?

**v12** On a scale from 1 (completely disagree) to 7 (completely agree), to what extent do you agree with the following statement: 'I am a person that is often lucky'

**v13** On a scale from 1 (very unhappy) to 10 (very happy), how happy do you feel at the moment?

## Appendix C: Full estimates

Appendix C1: Full Estimation Table 1 – Panel A

|                                                 |                    |                   |                   |
|-------------------------------------------------|--------------------|-------------------|-------------------|
| Lottery Ticket                                  | 0.40***<br>(0.12)  | 0.37***<br>(0.13) | 0.25**<br>(0.11)  |
| Female                                          |                    | -0.15**<br>(0.08) | -0.16**<br>(0.07) |
| Age                                             |                    | -0.00<br>(0.00)   | -0.00<br>(0.00)   |
| Employed                                        |                    | 0.05<br>(0.10)    | -0.00<br>(0.09)   |
| Unemployed                                      |                    | 0.29*<br>(0.15)   | 0.19<br>(0.14)    |
| High Household Income                           |                    | 0.08<br>(0.08)    | 0.04<br>(0.08)    |
| High Education Level                            |                    | 0.01<br>(0.09)    | 0.03<br>(0.08)    |
| High Socio-Economic Status                      |                    | 0.01<br>(0.10)    | -0.01<br>(0.09)   |
| Partner                                         |                    | 0.02<br>(0.09)    | 0.01<br>(0.08)    |
| Children                                        |                    | -0.06<br>(0.11)   | -0.09<br>(0.10)   |
| Urban Environment                               |                    | -0.07<br>(0.08)   | -0.07<br>(0.08)   |
| Northern Netherlands                            |                    | -0.19<br>(0.12)   | -0.06<br>(0.11)   |
| Eastern Netherlands                             |                    | -0.08<br>(0.10)   | -0.06<br>(0.10)   |
| Southern Netherlands                            |                    | -0.13<br>(0.10)   | -0.12<br>(0.09)   |
| Materialism                                     |                    | 0.01<br>(0.01)    | 0.01*<br>(0.00)   |
| Optimism                                        |                    | -0.01<br>(0.01)   | -0.00<br>(0.01)   |
| Internal Locus of Control                       |                    | 0.01<br>(0.01)    | 0.00<br>(0.01)    |
| Frequent Lottery Participation                  |                    | 0.09<br>(0.09)    | 0.15*<br>(0.08)   |
| Won in Past Year                                |                    | 0.34<br>(0.28)    | 0.21<br>(0.30)    |
| Thinks Chance of Winning is High                |                    | 0.01<br>(0.09)    | 0.02<br>(0.08)    |
| Difference in Duration Questionnaires T1-T2     |                    | 0.00<br>(0.00)    | 0.00*<br>(0.00)   |
| Difference in Enjoyability Questionnaires T1-T2 |                    | 0.10**<br>(0.05)  | 0.07<br>(0.04)    |
| Difference in Difficulty Questionnaires T1-T2   |                    | -0.05<br>(0.03)   | -0.05*<br>(0.03)  |
| Difference in Life Satisfaction T1-T2           |                    |                   | 0.48***<br>(0.05) |
| Constant                                        | -0.46***<br>(0.12) | -0.57<br>(0.53)   | -0.49<br>(0.48)   |
| Date dummies                                    | NO                 | YES               | YES               |
| $R^2$                                           | 0.01               | 0.07              | 0.20              |

1,142 observations. Robust standard errors in parentheses; \*\*\*  $p < 0.01$ , \*\*  $p < 0.05$ , \*  $p < 0.1$

Appendix C2: Full Estimation Table 1 – Panel B

|                                                 |                    |                   |                   |
|-------------------------------------------------|--------------------|-------------------|-------------------|
| Free Ticket                                     | 0.38***<br>(0.13)  | 0.37***<br>(0.13) | 0.26**<br>(0.12)  |
| Purchased Ticket                                | 0.56***<br>(0.20)  | 0.52**<br>(0.21)  | 0.39*<br>(0.21)   |
| Free and Purchased Ticket                       | 0.40***<br>(0.13)  | 0.34**<br>(0.14)  | 0.19<br>(0.13)    |
| Female                                          |                    | -0.15**<br>(0.08) | -0.16**<br>(0.07) |
| Age                                             |                    | -0.00<br>(0.00)   | -0.00<br>(0.00)   |
| Employed                                        |                    | 0.06<br>(0.10)    | -0.00<br>(0.09)   |
| Unemployed                                      |                    | 0.29*<br>(0.15)   | 0.18<br>(0.14)    |
| High Household Income                           |                    | 0.08<br>(0.08)    | 0.04<br>(0.08)    |
| High Education Level                            |                    | 0.01<br>(0.09)    | 0.03<br>(0.08)    |
| High Socio-Economic Status                      |                    | 0.01<br>(0.10)    | -0.02<br>(0.10)   |
| Partner                                         |                    | 0.02<br>(0.09)    | 0.01<br>(0.08)    |
| Children                                        |                    | -0.06<br>(0.11)   | -0.09<br>(0.10)   |
| Urban Environment                               |                    | -0.07<br>(0.08)   | -0.07<br>(0.08)   |
| Northern Netherlands                            |                    | -0.19<br>(0.12)   | -0.06<br>(0.11)   |
| Eastern Netherlands                             |                    | -0.08<br>(0.10)   | -0.06<br>(0.10)   |
| Southern Netherlands                            |                    | -0.13<br>(0.10)   | -0.13<br>(0.09)   |
| Materialism                                     |                    | 0.01<br>(0.01)    | 0.01*<br>(0.00)   |
| Optimism                                        |                    | -0.01<br>(0.01)   | -0.00<br>(0.01)   |
| Internal Locus of Control                       |                    | 0.01<br>(0.01)    | 0.00<br>(0.01)    |
| Frequent Lottery Participation                  |                    | 0.09<br>(0.09)    | 0.17**<br>(0.08)  |
| Won in Past Year                                |                    | 0.34<br>(0.28)    | 0.20<br>(0.30)    |
| Thinks Chance of Winning is High                |                    | 0.01<br>(0.09)    | 0.03<br>(0.08)    |
| Difference in Duration Questionnaires T1-T2     |                    | 0.00<br>(0.00)    | 0.00*<br>(0.00)   |
| Difference in Enjoyability Questionnaires T1-T2 |                    | 0.10**<br>(0.05)  | 0.07*<br>(0.04)   |
| Difference in Difficulty Questionnaires T1-T2   |                    | -0.05<br>(0.03)   | -0.05*<br>(0.03)  |
| Difference in Life Satisfaction T1-T2           |                    |                   | 0.48***<br>(0.05) |
| Constant                                        | -0.46***<br>(0.12) | -0.56<br>(0.53)   | -0.49<br>(0.48)   |
| Date Dummies                                    | NO                 | YES               | YES               |
| $R^2$                                           | 0.01               | 0.07              | 0.20              |

1,142 observations. Robust standard errors in parentheses; \*\*\* p<0.01, \*\* p<0.05, \* p<0.1



Appendix C3: Full Estimation Table 2

|                                                 |                    |                   |                   |                    |                   |                   |
|-------------------------------------------------|--------------------|-------------------|-------------------|--------------------|-------------------|-------------------|
| Ticket#No Thoughts About Lottery                | 0.08<br>(0.17)     | 0.16<br>(0.16)    | 0.07<br>(0.14)    | 0.08<br>(0.17)     | 0.16<br>(0.16)    | 0.07<br>(0.14)    |
| Lottery Ticket#Thought About Lottery            | 0.45***<br>(0.13)  | 0.41***<br>(0.13) | 0.29**<br>(0.12)  |                    |                   |                   |
| Ticket#Thought Sometimes About Lottery          |                    |                   |                   | 0.41***<br>(0.13)  | 0.39***<br>(0.13) | 0.27**<br>(0.12)  |
| Ticket#Thought Frequently About Lottery         |                    |                   |                   | 0.62***<br>(0.15)  | 0.52***<br>(0.16) | 0.39***<br>(0.14) |
| Female                                          |                    | -0.15*<br>(0.08)  | -0.16**<br>(0.07) |                    | -0.15*<br>(0.08)  | -0.16**<br>(0.07) |
| Age                                             |                    | -0.00<br>(0.00)   | -0.00<br>(0.00)   |                    | -0.00<br>(0.00)   | -0.00<br>(0.00)   |
| Employed                                        |                    | 0.06<br>(0.10)    | 0.01<br>(0.09)    |                    | 0.07<br>(0.10)    | 0.01<br>(0.09)    |
| Unemployed                                      |                    | 0.31**<br>(0.15)  | 0.21<br>(0.14)    |                    | 0.31**<br>(0.15)  | 0.21<br>(0.14)    |
| High Household Income                           |                    | 0.09<br>(0.08)    | 0.05<br>(0.08)    |                    | 0.09<br>(0.08)    | 0.05<br>(0.08)    |
| High Educaiton Level                            |                    | 0.01<br>(0.09)    | 0.03<br>(0.08)    |                    | 0.01<br>(0.09)    | 0.03<br>(0.08)    |
| High Socio-Economic Status                      |                    | 0.02<br>(0.10)    | -0.01<br>(0.10)   |                    | 0.02<br>(0.10)    | -0.00<br>(0.10)   |
| Partner                                         |                    | 0.02<br>(0.09)    | 0.01<br>(0.08)    |                    | 0.02<br>(0.09)    | 0.01<br>(0.08)    |
| Children                                        |                    | -0.05<br>(0.11)   | -0.09<br>(0.10)   |                    | -0.05<br>(0.11)   | -0.09<br>(0.10)   |
| Urban Environment                               |                    | -0.06<br>(0.08)   | -0.06<br>(0.08)   |                    | -0.06<br>(0.08)   | -0.06<br>(0.08)   |
| Northern Netherlands                            |                    | -0.18<br>(0.12)   | -0.05<br>(0.11)   |                    | -0.18<br>(0.12)   | -0.05<br>(0.11)   |
| Eastern Netherlands                             |                    | -0.08<br>(0.10)   | -0.06<br>(0.10)   |                    | -0.08<br>(0.10)   | -0.06<br>(0.10)   |
| Southern Netherlands                            |                    | -0.13<br>(0.10)   | -0.13<br>(0.09)   |                    | -0.13<br>(0.10)   | -0.12<br>(0.09)   |
| Materialism                                     |                    | 0.01<br>(0.01)    | 0.01<br>(0.00)    |                    | 0.00<br>(0.01)    | 0.01<br>(0.00)    |
| Optimism                                        |                    | -0.02<br>(0.01)   | -0.01<br>(0.01)   |                    | -0.02<br>(0.01)   | -0.01<br>(0.01)   |
| Internal Locus of Control                       |                    | 0.01<br>(0.01)    | 0.01<br>(0.01)    |                    | 0.01<br>(0.01)    | 0.01<br>(0.01)    |
| Frequent Lottery Participation                  |                    | 0.05<br>(0.09)    | 0.12<br>(0.08)    |                    | 0.05<br>(0.09)    | 0.12<br>(0.08)    |
| Won in Past Year                                |                    | 0.36<br>(0.28)    | 0.23<br>(0.30)    |                    | 0.35<br>(0.28)    | 0.22<br>(0.30)    |
| Thinks Chance of Winning is High                |                    | -0.00<br>(0.09)   | 0.02<br>(0.08)    |                    | -0.01<br>(0.09)   | 0.01<br>(0.08)    |
| Difference in Duration Questionnaires T1-T2     |                    | 0.00<br>(0.00)    | 0.00*<br>(0.00)   |                    | 0.00<br>(0.00)    | 0.00*<br>(0.00)   |
| Difference in Enjoyability Questionnaires T1-T2 |                    | 0.09*<br>(0.05)   | 0.06<br>(0.04)    |                    | 0.08*<br>(0.05)   | 0.05<br>(0.04)    |
| Difference in Difficulty Questionnaires T1-T2   |                    | -0.05<br>(0.03)   | -0.05*<br>(0.03)  |                    | -0.04<br>(0.03)   | -0.05<br>(0.03)   |
| Difference in Life Satisfaction T1-T2           |                    |                   | 0.48***<br>(0.05) |                    |                   | 0.48***<br>(0.05) |
| Constant                                        | -0.46***<br>(0.12) | -0.27<br>(0.52)   | -0.27<br>(0.47)   | -0.46***<br>(0.12) | -0.25<br>(0.52)   | -0.25<br>(0.47)   |
| Date Dumies                                     | NO                 | YES               | YES               | NO                 | YES               | YES               |
| R <sup>2</sup>                                  | 0.02               | 0.08              | 0.20              | 0.02               | 0.08              | 0.20              |

1,140 observations. Robust standard errors in parentheses; \*\*\* p&lt;0.01, \*\* p&lt;0.05, \* p&lt;0.1

Appendix C4: Full Estimation Table 3

|                                                 |                    |                   |                    |                   |                    |                   |
|-------------------------------------------------|--------------------|-------------------|--------------------|-------------------|--------------------|-------------------|
| Lottery Ticket                                  | 0.40***<br>(0.12)  | 0.26**<br>(0.11)  | 0.40***<br>(0.12)  | 0.26**<br>(0.11)  | 0.40***<br>(0.13)  | 0.26**<br>(0.11)  |
| Lottery Ticket * PANA score (mean-centered)     | 0.09***<br>(0.03)  | 0.07**<br>(0.03)  |                    |                   |                    |                   |
| Lottery Ticket * PA score (mean-centered)       |                    |                   | 0.12***<br>(0.03)  | 0.08**<br>(0.03)  |                    |                   |
| Lottery Ticket * NA score (mean-centered)       |                    |                   |                    |                   | -0.02<br>(0.05)    | -0.02<br>(0.05)   |
| Female                                          |                    | -0.18**<br>(0.07) |                    | -0.18**<br>(0.07) |                    | -0.16**<br>(0.07) |
| Age                                             |                    | -0.00<br>(0.00)   |                    | -0.00<br>(0.00)   |                    | -0.00<br>(0.00)   |
| Employed                                        |                    | 0.00<br>(0.09)    |                    | 0.01<br>(0.09)    |                    | -0.00<br>(0.09)   |
| Unemployed                                      |                    | 0.19<br>(0.14)    |                    | 0.20<br>(0.14)    |                    | 0.19<br>(0.14)    |
| High Household Income                           |                    | 0.04<br>(0.08)    |                    | 0.05<br>(0.08)    |                    | 0.04<br>(0.08)    |
| High Education Level                            |                    | 0.04<br>(0.08)    |                    | 0.04<br>(0.08)    |                    | 0.03<br>(0.08)    |
| High Socio-Economic Status                      |                    | 0.01<br>(0.10)    |                    | 0.00<br>(0.09)    |                    | -0.01<br>(0.10)   |
| Partner                                         |                    | 0.01<br>(0.08)    |                    | 0.01<br>(0.08)    |                    | 0.01<br>(0.08)    |
| Children                                        |                    | -0.08<br>(0.10)   |                    | -0.08<br>(0.10)   |                    | -0.09<br>(0.10)   |
| Urban Environment                               |                    | -0.07<br>(0.08)   |                    | -0.07<br>(0.08)   |                    | -0.07<br>(0.08)   |
| Northern Netherlands                            |                    | -0.06<br>(0.11)   |                    | -0.05<br>(0.11)   |                    | -0.06<br>(0.11)   |
| Eastern Netherlands                             |                    | -0.06<br>(0.10)   |                    | -0.05<br>(0.10)   |                    | -0.06<br>(0.10)   |
| Southern Netherlands                            |                    | -0.13<br>(0.09)   |                    | -0.12<br>(0.09)   |                    | -0.12<br>(0.09)   |
| Materialism                                     |                    | 0.01<br>(0.00)    |                    | 0.01<br>(0.01)    |                    | 0.01*<br>(0.00)   |
| Optimism                                        |                    | -0.01<br>(0.01)   |                    | -0.01<br>(0.01)   |                    | -0.01<br>(0.01)   |
| Internal Locus of Control                       |                    | 0.01<br>(0.01)    |                    | 0.01<br>(0.01)    |                    | 0.00<br>(0.01)    |
| Frequent Lottery Participation                  |                    | 0.12<br>(0.08)    |                    | 0.12<br>(0.08)    |                    | 0.15*<br>(0.08)   |
| Won in Past Year                                |                    | 0.20<br>(0.30)    |                    | 0.20<br>(0.30)    |                    | 0.21<br>(0.30)    |
| Thinks Chance of Winning is High                |                    | 0.01<br>(0.08)    |                    | 0.00<br>(0.08)    |                    | 0.03<br>(0.08)    |
| Difference in Duration Questionnaires T1-T2     |                    | 0.00<br>(0.00)    |                    | 0.00<br>(0.00)    |                    | 0.00*<br>(0.00)   |
| Difference in Enjoyability Questionnaires T1-T2 |                    | 0.04<br>(0.04)    |                    | 0.05<br>(0.04)    |                    | 0.07<br>(0.04)    |
| Difference in Difficulty Questionnaires T1-T2   |                    | -0.05*<br>(0.03)  |                    | -0.05*<br>(0.03)  |                    | -0.05*<br>(0.03)  |
| Difference in Life Satisfaction T1-T2           |                    | 0.48***<br>(0.05) |                    | 0.48***<br>(0.05) |                    | 0.48***<br>(0.05) |
| Constant                                        | -0.46***<br>(0.12) | -0.15<br>(0.47)   | -0.46***<br>(0.12) | -0.21<br>(0.47)   | -0.46***<br>(0.12) | -0.25<br>(0.48)   |
| Date dummies                                    | NO                 | YES               | NO                 | YES               | NO                 | YES               |
| R <sup>2</sup>                                  | 0.02               | 0.20              | 0.02               | 0.20              | 0.01               | 0.20              |

1,140 observations. Robust standard errors in parentheses; \*\*\* p&lt;0.01, \*\* p&lt;0.05, \* p&lt;0.1

Appendix C5: Full Estimation Table 4 – Panel A

|                                                                       |                   |                  |                  |                   |                   |
|-----------------------------------------------------------------------|-------------------|------------------|------------------|-------------------|-------------------|
| Lottery Ticket and No Prize                                           | -0.10<br>(0.11)   | -0.05<br>(0.11)  | -0.04<br>(0.12)  | -0.09<br>(0.11)   | -0.15<br>(0.10)   |
| Lottery Ticket and Prize                                              | 0.10<br>(0.11)    | 0.15<br>(0.11)   | 0.15<br>(0.11)   | 0.09<br>(0.11)    | 0.02<br>(0.10)    |
| Female                                                                |                   | -0.14*<br>(0.08) | -0.14*<br>(0.08) | -0.17**<br>(0.08) | -0.17**<br>(0.08) |
| Age                                                                   |                   | -0.01<br>(0.00)  | -0.01<br>(0.00)  | -0.00<br>(0.00)   | -0.00<br>(0.00)   |
| Employed                                                              |                   | -0.12<br>(0.10)  | -0.12<br>(0.10)  | -0.10<br>(0.10)   | -0.10<br>(0.10)   |
| Unemployed                                                            |                   | 0.05<br>(0.15)   | 0.05<br>(0.15)   | 0.09<br>(0.15)    | 0.09<br>(0.14)    |
| High Household Income                                                 |                   | 0.07<br>(0.09)   | 0.08<br>(0.09)   | 0.06<br>(0.09)    | -0.01<br>(0.08)   |
| High Education Level                                                  |                   | 0.07<br>(0.09)   | 0.06<br>(0.09)   | 0.06<br>(0.09)    | 0.11<br>(0.08)    |
| High Socio-Economic Status                                            |                   | 0.13<br>(0.10)   | 0.12<br>(0.10)   | 0.12<br>(0.10)    | 0.05<br>(0.09)    |
| Partner                                                               |                   | -0.07<br>(0.10)  | -0.07<br>(0.10)  | -0.06<br>(0.09)   | -0.05<br>(0.09)   |
| Children                                                              |                   | -0.01<br>(0.11)  | -0.02<br>(0.11)  | -0.06<br>(0.11)   | -0.09<br>(0.10)   |
| Urban Environment                                                     |                   | -0.03<br>(0.08)  | -0.03<br>(0.08)  | -0.00<br>(0.08)   | -0.00<br>(0.08)   |
| Northern Netherlands                                                  |                   | -0.10<br>(0.12)  | -0.10<br>(0.12)  | -0.08<br>(0.12)   | 0.02<br>(0.11)    |
| Eastern Netherlands                                                   |                   | 0.09<br>(0.11)   | 0.08<br>(0.11)   | 0.08<br>(0.11)    | 0.11<br>(0.10)    |
| Southern Netherlands                                                  |                   | -0.09<br>(0.10)  | -0.09<br>(0.10)  | -0.07<br>(0.10)   | -0.04<br>(0.09)   |
| Materialism                                                           |                   | -0.00<br>(0.01)  | 0.00<br>(0.01)   | -0.00<br>(0.01)   | 0.00<br>(0.00)    |
| Optimism                                                              |                   | -0.01<br>(0.01)  | -0.01<br>(0.01)  | -0.01<br>(0.01)   | -0.00<br>(0.01)   |
| Internal Locus Control                                                |                   | -0.00<br>(0.01)  | 0.00<br>(0.01)   | 0.00<br>(0.01)    | 0.00<br>(0.01)    |
| Frequent Lottery Participation                                        |                   |                  | -0.04<br>(0.09)  | -0.03<br>(0.09)   | 0.02<br>(0.08)    |
| Won in Past Year                                                      |                   |                  | 0.37<br>(0.25)   | 0.35<br>(0.26)    | 0.23<br>(0.27)    |
| Thinks Chance Winning High                                            |                   |                  | 0.00<br>(0.09)   | -0.06<br>(0.09)   | -0.03<br>(0.09)   |
| Difference in Duration Questionnaires T1-T3                           |                   |                  |                  | 0.00<br>(0.00)    | 0.00<br>(0.00)    |
| Difference in Enjoyability Questionnaires T1-T3                       |                   |                  |                  | 0.15***<br>(0.06) | 0.11**<br>(0.06)  |
| Difference in Difficulty Questionnaires T1-T3                         |                   |                  |                  | -0.05<br>(0.04)   | -0.06*<br>(0.03)  |
| Difference in Life Satisfaction T1-T3                                 |                   |                  |                  |                   | 0.50***<br>(0.05) |
| Constant                                                              | -0.24**<br>(0.10) | 0.59<br>(0.50)   | 0.56<br>(0.50)   | 0.38<br>(0.50)    | -0.02<br>(0.46)   |
| Date Dummies                                                          | NO                | NO               | NO               | YES               | YES               |
| $R^2$                                                                 | 0.01              | 0.02             | 0.02             | 0.06              | 0.18              |
| Robust standard errors in parentheses; *** p<0.01, ** p<0.05, * p<0.1 |                   |                  |                  |                   |                   |

Appendix C6: Full Estimation Table 4 – Panel B

|                                                 |                   |                  |                  |                   |                   |
|-------------------------------------------------|-------------------|------------------|------------------|-------------------|-------------------|
| Free Ticket and No Prize                        | -0.15<br>(0.12)   | -0.11<br>(0.12)  | -0.11<br>(0.12)  | -0.15<br>(0.12)   | -0.19*<br>(0.11)  |
| Purchased Ticket and No Prize                   | -0.05<br>(0.23)   | 0.04<br>(0.25)   | 0.05<br>(0.25)   | 0.06<br>(0.26)    | -0.03<br>(0.22)   |
| Free and Purchased Ticket and No Prize          | 0.05<br>(0.14)    | 0.10<br>(0.14)   | 0.11<br>(0.14)   | 0.04<br>(0.14)    | -0.08<br>(0.13)   |
| Free Ticket and Prize                           | 0.22*<br>(0.12)   | 0.25**<br>(0.12) | 0.25**<br>(0.12) | 0.17<br>(0.12)    | 0.10<br>(0.10)    |
| Purchased Ticket and Prize                      | 0.04<br>(0.24)    | 0.08<br>(0.25)   | 0.10<br>(0.26)   | 0.08<br>(0.25)    | -0.00<br>(0.24)   |
| Free and Purchased Ticket and Prize             | -0.10<br>(0.13)   | -0.04<br>(0.14)  | -0.03<br>(0.14)  | -0.07<br>(0.15)   | -0.14<br>(0.13)   |
| Female                                          |                   | -0.13*<br>(0.08) | -0.13<br>(0.08)  | -0.16**<br>(0.08) | -0.16**<br>(0.08) |
| Age                                             |                   | -0.01<br>(0.00)  | -0.01<br>(0.00)  | -0.00<br>(0.00)   | -0.00<br>(0.00)   |
| Employed                                        |                   | -0.11<br>(0.10)  | -0.11<br>(0.10)  | -0.10<br>(0.10)   | -0.10<br>(0.10)   |
| Unemployed                                      |                   | 0.02<br>(0.15)   | 0.03<br>(0.15)   | 0.07<br>(0.15)    | 0.07<br>(0.14)    |
| High Household Income                           |                   | 0.07<br>(0.09)   | 0.07<br>(0.09)   | 0.06<br>(0.09)    | -0.01<br>(0.08)   |
| High Education Level                            |                   | 0.06<br>(0.09)   | 0.06<br>(0.09)   | 0.05<br>(0.09)    | 0.10<br>(0.08)    |
| High Socio-Economic Status                      |                   | 0.14<br>(0.10)   | 0.13<br>(0.10)   | 0.13<br>(0.10)    | 0.06<br>(0.09)    |
| Partner                                         |                   | -0.07<br>(0.10)  | -0.07<br>(0.10)  | -0.05<br>(0.09)   | -0.04<br>(0.09)   |
| Children                                        |                   | -0.01<br>(0.11)  | -0.02<br>(0.11)  | -0.06<br>(0.11)   | -0.09<br>(0.10)   |
| Urban Environment                               |                   | -0.02<br>(0.09)  | -0.03<br>(0.08)  | 0.00<br>(0.08)    | -0.00<br>(0.08)   |
| Northern Netherlands                            |                   | -0.09<br>(0.12)  | -0.10<br>(0.12)  | -0.08<br>(0.12)   | 0.02<br>(0.11)    |
| Eastern Netherlands                             |                   | 0.10<br>(0.11)   | 0.09<br>(0.11)   | 0.09<br>(0.11)    | 0.12<br>(0.10)    |
| Southern Netherlands                            |                   | -0.08<br>(0.10)  | -0.08<br>(0.10)  | -0.07<br>(0.10)   | -0.04<br>(0.09)   |
| Materialism                                     |                   | -0.00<br>(0.01)  | 0.00<br>(0.01)   | -0.00<br>(0.01)   | 0.00<br>(0.00)    |
| Optimism                                        |                   | -0.01<br>(0.01)  | -0.01<br>(0.01)  | -0.01<br>(0.01)   | -0.00<br>(0.01)   |
| Internal Locus of Control                       |                   | 0.00<br>(0.01)   | 0.00<br>(0.01)   | 0.00<br>(0.01)    | 0.00<br>(0.01)    |
| Frequent Lottery Participation                  |                   |                  | -0.02<br>(0.09)  | -0.01<br>(0.09)   | 0.04<br>(0.09)    |
| Won in Past Year                                |                   |                  | 0.35<br>(0.25)   | 0.34<br>(0.26)    | 0.21<br>(0.27)    |
| Thinks Chance of Winning is High                |                   |                  | -0.00<br>(0.09)  | -0.05<br>(0.09)   | -0.03<br>(0.09)   |
| Difference in Duration Questionnaires T1-T3     |                   |                  |                  | 0.00<br>(0.00)    | 0.00<br>(0.00)    |
| Difference in Enjoyability Questionnaires T1-T3 |                   |                  |                  | 0.15**<br>(0.06)  | 0.11**<br>(0.06)  |
| Difference in Difficulty Questionnaires T1-T3   |                   |                  |                  | -0.04<br>(0.04)   | -0.05*<br>(0.03)  |
| Difference in Life Satisfaction T1-T3           |                   |                  |                  |                   | 0.49***<br>(0.05) |
| Constant                                        | -0.24**<br>(0.10) | 0.49<br>(0.50)   | 0.47<br>(0.51)   | 0.31<br>(0.50)    | 0.12<br>(0.46)    |
| Date Dummies                                    | NO                | NO               | NO               | YES               | YES               |
| $R^2$                                           | 0.01              | 0.03             | 0.03             | 0.06              | 0.18              |

1,097 observations. Robust standard errors in parentheses; \*\*\* p&lt;0.01, \*\* p&lt;0.05, \* p&lt;0.1
